# Supplementary material
Source: publisher figshare collection journal article supplement (https://frontiersin.figshare.com/ndownloader/files/31314781)
Supplement: Supplementary file [file 31314781]

**This is the SUPPLEMENTARY MATERIAL for  
Focused Research on the Challenges and Productivity of Researchers in  
Nigerian Academic Institutions without Funding**

*Citation: Igiri BE, Okoduwa SIR, Akabuogu EP, Okoduwa UJ, Enang IA, Idowu OO, Abdullahi S, Onukak IE, Onuruka CC, Christopher OPO, Salawu AO, Chris AO, and Onyemachi DI (2021) Research Study on the Challenges and Productivity of Researchers in Nigeria Academic Institutions Without Funding. Front. Res. Metr. Anal. 6:727228. doi: 10.3389/frma.2021.727228*

*Correspondence:*  
Stanley I.R. Okoduwa  
[siroplc@gmail.com](mailto:siroplc@gmail.com)

**Highlight of the Tertiary and Academic Research Institutions in Nigeria**

The strategic players in research and development (R&D) in Nigeria are the research-focused institutions, tertiary education system, private research establishments, and government agencies with R&D mandates. Presently, there are 197 universities (NUC, 2021a,b,c) with varying capacities for pure and applied R&D, 140 polytechnics with modest capacities in applied research (NBTE, 2021a,b,c), 89 colleges and specialized technological institutions (NCCE, 2021), 25 monotechnics (NBTE, 2021a,b,c), and 66 research institutes (FMARD, 2021; Nigerian Guide, 2021) with R & D programs targeted at the different sectors of the economy with a few recording some measure of success in product and process innovation. A simple random sampling of these institutions was conducted in a focused research in order to examine the challenges and productivity of researchers in Nigerian academic institutions without funding. The findings obtained in the research is documented in the main article which is available at doi: 10.3389/frma.2021.727228

| CONTENT                                                    | PAGE |
|------------------------------------------------------------|------|
| 1. Statistics of tertiary academic institutions in Nigeria | 2    |
| 2. Research institutions in Nigeria                        | 3    |
| 3. Federal universities in Nigeria                         | 4    |
| 4. State universities in Nigeria                           | 5    |
| 5. Private universities in Nigeria                         | 6    |
| 6. Federal polytechnics in Nigeria                         | 10   |
| 7. State polytechnics in Nigeria                           | 10   |
| 8. Private polytechnics in Nigeria                         | 11   |
| 9. Federal colleges in Nigeria                             | 12   |
| 10. State colleges in Nigeria                              | 13   |
| 11. Private colleges in Nigeria                            | 14   |
| 12. Federal monotechnics in Nigeria                        | 15   |
| 13. State monotechnics in Nigeria                          | 15   |
| 14. Private monotechnics in Nigeria                        | 15   |

## STATISTICS OF TERTIARY ACADEMIC INSTITUTIONS IN NIGERIA

**Table S1** | Summary of the Tertiary Academic Institutions in Nigeria

|         | Universities | Polytechnics | Monotechnics | Colleges of Education |
|---------|--------------|--------------|--------------|-----------------------|
| Federal | 45           | 31           | 21           | 22                    |
| State   | 53           | 48           | 2            | 47                    |
| Private | 99           | 61           | 2            | 20                    |
| TOTAL   | <b>197</b>   | <b>140</b>   | <b>25</b>    | <b>89</b>             |

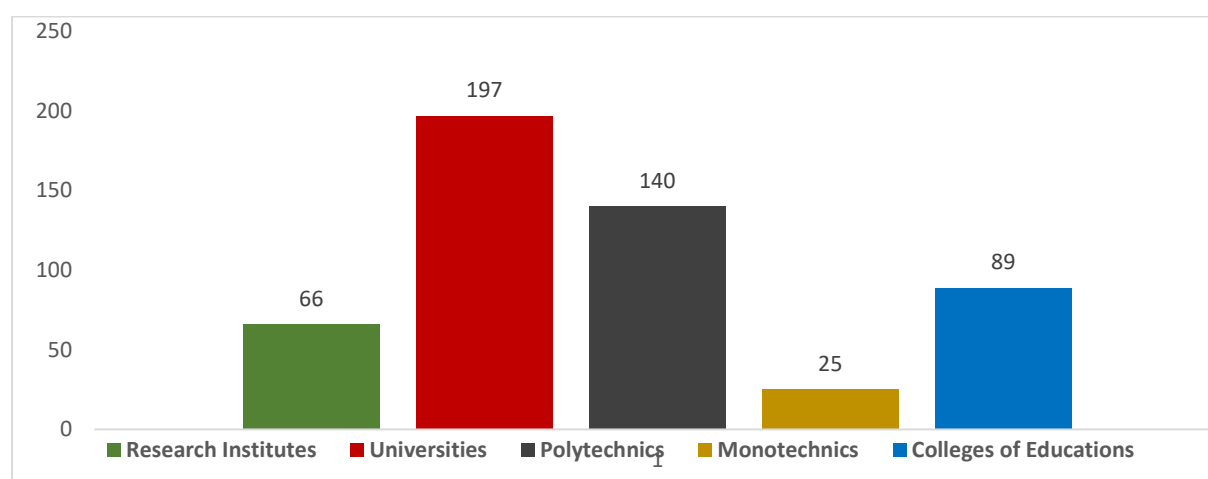

**FIGURE S1** | Distribution of tertiary academic institutions in Nigeria

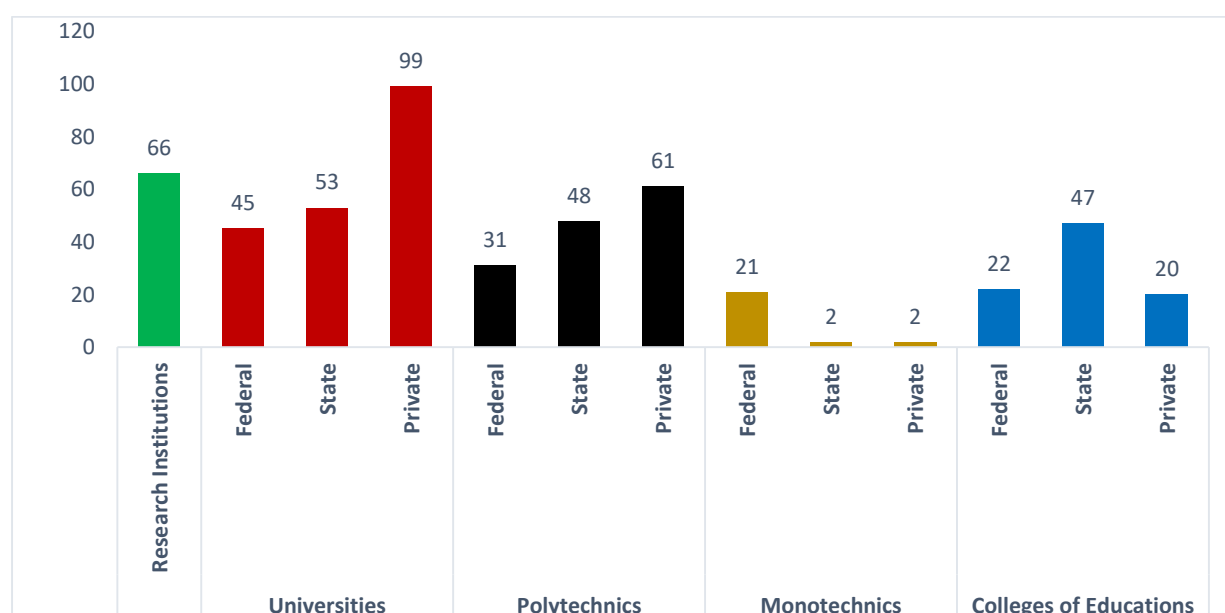

**Figure S2** | Statistics of the Tertiary Academic Institutions in Nigeria

**Table S2** | List of Research Institutions in Nigeria (CWN, 2021; FMARD, 2021; Nigerian Guide, 2021)

| S/N | Names of Research Institutions in Nigeria                                                          |
|-----|----------------------------------------------------------------------------------------------------|
| 1   | Agricultural Research Council of Nigeria (ARCN)                                                    |
| 2   | Agricultural Rural Management Training Institute (ARMTI), Ilorin                                   |
| 3   | Animal Health Research Institutes (AHRI)                                                           |
| 4   | Animal Production, Fisheries and Oceanography Research Institutes (APFORI)                         |
| 5   | Arable Crops Research Institutes (ACRI)                                                            |
| 6   | Center for Energy Research and Development (CERD)                                                  |
| 7   | Centre for Energy Research and Training (CERT)                                                     |
| 8   | Centre for Management Development (CMD)                                                            |
| 9   | Cocoa Research Institute of Nigeria, Ibadan, (CRIN), Oyo                                           |
| 10  | Energy Commission of Nigeria (ECN)                                                                 |
| 11  | Federal College of Freshwater Fisheries Technology, (FCFFT) New Bussa                              |
| 12  | Federal Institute of Industrial Research (FIIRO), Oshodi, Lagos                                    |
| 13  | Federal Ministry of Agriculture (FMA)                                                              |
| 14  | Federal Ministry of Science, Technology and Innovation (FMSTI)                                     |
| 15  | Federal Ministry of Water Resources (FMWR)                                                         |
| 16  | Forestry Research Institute of Nigeria (FRIN), Ibadan                                              |
| 17  | Forestry, Horticulture and Tree Crops Research Institutes (FHTCRI)                                 |
| 18  | Institute for Advanced Medical Research and Training (IAMRT)                                       |
| 19  | Institute for Agricultural Research (IAR)                                                          |
| 20  | Institute of Agricultural Research & Extension Services, (IAR & ES) Ahmadu Bello University, Zaria |
| 21  | Institute of Agricultural Research & Training, (IAR & T) Obafemi Awolowo University, Ibadan        |
| 22  | Institute of Archaeology and Museum Studies (IAMS)                                                 |
| 23  | Institute of Chartered Chemists of Nigeria (ICCON)                                                 |
| 24  | Institute of Child Health (ICH)                                                                    |
| 25  | Institute of Human Virology (IHV), Abuja                                                           |
| 26  | Institute of Operations Research of Nigeria (INFORN)                                               |
| 27  | International Institute of Tropical Agriculture (IITA)                                             |
| 28  | International Livestock Research Institute (ILRI)                                                  |
| 29  | Lake Chad Research Institute (LCRI)                                                                |
| 30  | National Agency for Food and Drug Administration and Control (NAFDAC)                              |
| 31  | National Agency for Science & Engineering Infrastructure (NASENI), Abuja                           |
| 32  | National Agricultural Extension Research and Liaison Services (AERLS)                              |
| 33  | National Animal Production Research Institute, (NAPRI) Zaria                                       |
| 34  | National Center for Agricultural Mechanization (NCAM)                                              |
| 35  | National Center for Energy Research and Development (NCERD)                                        |
| 36  | National Center for Technology Management (NCTM)                                                   |
| 37  | National Centre for Genetic Resources and Biotechnology (NACGRAB)                                  |
| 38  | National Cereals Research Institute (NCRI)                                                         |
| 39  | National Horticultural Research Institute (NIHORT)                                                 |
| 40  | National Institute for Pharmaceutical Research and Development (NIPRD)                             |
| 41  | National Institute of Freshwater Fisheries Research, New Bussa                                     |
| 42  | Nigerian Institute of Leather and Science Technology (NILEST)                                      |
| 43  | National Research Institute for Chemical Technology (NARICT)                                       |

|    |                                                                            |
|----|----------------------------------------------------------------------------|
| 44 | National Root Crops Research Institute (NRCI)                              |
| 45 | National Space Research and Development Agency (NASRDA)                    |
| 46 | National Veterinary Research Institute (NVRI)                              |
| 47 | Nigeria Institute of Science Laboratory (NISLT)                            |
| 48 | Nigerian Academy of Science (NAS)                                          |
| 49 | Nigerian Building and Road Research Institute (NBRRI)                      |
| 50 | Nigerian Educational Research Council (NERC)                               |
| 51 | Nigerian Institute for Oceanography and Marine Research (NIOMR)            |
| 52 | Nigerian Institute for Oil Palm Research (NIFOR), Benin City Edo State     |
| 53 | Nigerian Institute for Trypanosomiasis Research (NITR)                     |
| 54 | Nigerian Institute of Food Science and Technology (NIFST)                  |
| 55 | Nigerian Institute of Medical Research (NIMR)                              |
| 56 | Nigerian Institute of Social and Economic Research (NISER)                 |
| 57 | Nigerian Stored Products Research Institute (NSPRI)                        |
| 58 | Projects Development Institute (PRODA)                                     |
| 59 | Raw Materials Research and Development Council (RMRDC)                     |
| 60 | Research Institutes Organisations in Nigeria (RION)                        |
| 61 | Rubber Research Institute of Nigeria (RRIN), Iyanomo, Benin City Edo State |
| 62 | Scientific Equipment Development Institute (SEDI-E)                        |
| 63 | Sheda Science and Technology Complex (SHESTCO)                             |
| 64 | Social Sciences Academy of Nigeria (SSAN)                                  |
| 65 | Sokoto Energy Research Centre (SERC)                                       |
| 66 | Unilorin Sugar Research Institute (USRI)                                   |

**Table S3** | List of Federal Universities in Nigeria (NUC, 2021a)

| S/N | Names of Federal Universities in Nigeria           | Year Established |
|-----|----------------------------------------------------|------------------|
| 1   | Abubakar Tafawa Balewa University, (ATBU) Bauchi   | 1988             |
| 2   | Ahmadu Bello University, (ABU) Zaria               | 1962             |
| 3   | Bayero University, Kano                            | 1975             |
| 4   | Federal University Gashua, Yobe                    | 2013             |
| 5   | Federal University of Petroleum Resources, Effurun | 2007             |
| 6   | Federal University of Technology, Akure            | 1981             |
| 7   | Federal University of Technology, Minna            | 1982             |
| 8   | Federal University of Technology, Owerri           | 1980             |
| 9   | Federal University, Dutse, Jigawa State            | 2011             |
| 10  | Federal University, Dutsin-Ma, Katsina             | 2011             |
| 11  | Federal University, Kashere, Gombe State           | 2011             |
| 12  | Federal University, Lafia, Nasarawa State          | 2011             |
| 13  | Federal University, Lokoja, Kogi State             | 2011             |
| 14  | Federal University, Ndifu-Alike, Ebonyi State      | 2011             |
| 15  | Federal University, Otuoke, Bayelsa                | 2011             |
| 16  | Federal University, Oye-Ekiti, Ekiti State         | 2011             |
| 17  | Federal University, Wukari, Taraba State           | 2011             |
| 18  | Federal University, Birnin Kebbi                   | 2013             |
| 19  | Federal University, Gusau Zamfara                  | 2013             |
| 20  | Michael Okpara University of Agricultural Umudike  | 1992             |

|    |                                                      |      |
|----|------------------------------------------------------|------|
| 21 | Modibbo Adama University of Technology, Yola         | 1981 |
| 22 | National Open University of Nigeria, Lagos           | 2002 |
| 23 | Nigeria Police Academy Wudil                         | 2013 |
| 24 | Nigerian Defence Academy Kaduna                      | 1985 |
| 25 | Nnamdi Azikiwe University, Awka                      | 1992 |
| 26 | Obafemi Awolowo University, Ile-Ife                  | 1962 |
| 27 | University of Abuja, Gwagwalada                      | 1988 |
| 28 | Federal University of Agriculture, Abeokuta          | 1988 |
| 29 | University of Agriculture, Makurdi                   | 1988 |
| 30 | University of Benin                                  | 1970 |
| 31 | University of Calabar                                | 1975 |
| 32 | University of Ibadan                                 | 1948 |
| 33 | University of Ilorin                                 | 1975 |
| 34 | University of Jos                                    | 1975 |
| 35 | University of Lagos                                  | 1962 |
| 36 | University of Maiduguri                              | 1975 |
| 37 | University of Nigeria, Nsukka                        | 1960 |
| 38 | University of Port-Harcourt                          | 1975 |
| 39 | University of Uyo                                    | 1991 |
| 40 | Usumanu Danfodiyo University                         | 1975 |
| 41 | Nigerian Maritime University Okerenkoko, Delta State | 2018 |
| 42 | Air Force Institute of Technology, Kaduna            | 2018 |
| 43 | Nigerian Army University Bui                         | 2018 |
| 44 | University of Health Technology, Otukpo Benue State  | 2020 |
| 45 | Federal University of Agriculture, Zuru, Kebbi State | 2020 |

**Table S4 |** List of State Universities in Nigeria (NUC, 2021c)

| S/N | Names of State Universities in Nigeria                        | Year Established |
|-----|---------------------------------------------------------------|------------------|
| 1   | Abia State University, Uturu                                  | 1981             |
| 2   | Adamawa State University Mubi                                 | 2002             |
| 3   | Adekunle Ajasin University, Akungba                           | 1999             |
| 4   | Akwa Ibom State University of Technology, Uyo                 | 2010             |
| 5   | Ambrose Alli University, Ekpoma                               | 1980             |
| 6   | Chukwuemeka Odumegwu Ojukwu University, Uli                   | 2000             |
| 7   | Bauchi State University, Gadau                                | 2011             |
| 8   | Benue State University, Makurdi                               | 1992             |
| 9   | Yobe State University, Damaturu                               | 2006             |
| 10  | Cross River State University of Science & Technology, Calabar | 2004             |
| 11  | Delta State University Abraka                                 | 1992             |
| 12  | Ebonyi State University, Abakaliki                            | 2000             |
| 13  | Ekiti State University                                        | 1982             |
| 14  | Enugu State University of Science and Technology, Enugu       | 1982             |
| 15  | Gombe State University, Gombe                                 | 2004             |
| 16  | Ibrahim Badamasi Babangida University, Lapai                  | 2005             |
| 17  | Ignatius Ajuru University of Education, Rumuolumeni           | 2010             |
| 18  | Imo State University, Owerri                                  | 1992             |

|    |                                                                |      |
|----|----------------------------------------------------------------|------|
| 19 | Sule Lamido University, Kafin Hausa, Jigawa                    | 2013 |
| 20 | Kaduna State University, Kaduna                                | 2004 |
| 21 | Kano University of Science & Technology, Wudil                 | 2000 |
| 22 | Kebbi State University, Kebbi                                  | 2006 |
| 23 | Kogi State University Anyigba                                  | 1999 |
| 24 | Kwara State University, Ilorin                                 | 2009 |
| 25 | Ladoke Akintola University of Technology, Ogbomoso             | 1990 |
| 26 | Ondo State University of Science and Technology Okitipupa      | 2008 |
| 27 | River State University of Science and Technology               | 1979 |
| 28 | Olabisi Onabanjo University, Ago Iwoye                         | 1982 |
| 29 | Lagos State University, Ojo                                    | 1983 |
| 30 | Niger Delta University Yenagoa                                 | 2000 |
| 31 | Nasarawa State University Keffi                                | 2002 |
| 32 | Plateau State University Bokokos                               | 2005 |
| 33 | Tai Solarin University of Education Ijebu Ode                  | 2005 |
| 34 | Umar Musa Yar' Adua University Katsina                         | 2006 |
| 35 | Osun State University Osogbo                                   | 2006 |
| 36 | Taraba State University, Jalingo                               | 2008 |
| 37 | Sokoto State University                                        | 2009 |
| 38 | Northwest University Kano                                      | 2012 |
| 39 | Oyo State Technical University Ibadan                          | 2012 |
| 40 | Ondo State University of Medical Sciences                      | 2015 |
| 41 | Edo University Iyamo                                           | 2016 |
| 42 | Eastern Palm University Ogboko, Imo State                      | 2016 |
| 43 | University of Africa Toru Orua, Bayelsa State                  | 2016 |
| 44 | Bornu State University, Maiduguri                              | 2016 |
| 45 | Moshood Abiola University of Science and Technology Abeokuta   | 2017 |
| 46 | Gombe State University of Science and Technology               | 2017 |
| 47 | Zamfara State University                                       | 2018 |
| 48 | Bayelsa Medical University                                     | 2019 |
| 49 | Confluence University of Science and Technology, Osara,        | 2020 |
| 50 | University of Delta, Agbor                                     | 2021 |
| 51 | Delta University of Science and Technology, Ozoro              | 2021 |
| 52 | Dennis Osadebe University, Asaba                               | 2021 |
| 53 | King David University of Medical Sciences, Uburu, Ebonyi State | 2021 |

**Table S5 |** List of Private Universities in Nigeria (NUC, 2021b)

| S/N | Names of Private Universities in Nigeria          | Year Established |
|-----|---------------------------------------------------|------------------|
| 1   | Achievers University, Owo                         | 2007             |
| 2   | Adeleke University, Ede                           | 2011             |
| 3   | Afe Babalola University, Ado-Ekiti – Ekiti State  | 2009             |
| 4   | African University of Science & Technology, Abuja | 2007             |
| 5   | Ajayi Crowther University, Ibadan                 | 2005             |
| 6   | Al-Hikmah University, Ilorin                      | 2005             |

|    |                                                      |      |
|----|------------------------------------------------------|------|
| 7  | Al-Qalam University, Katsina                         | 2005 |
| 8  | American University of Nigeria, Yola                 | 2003 |
| 9  | Augustine University                                 | 2015 |
| 10 | Babcock University, Ilishan-Remo                     | 1999 |
| 11 | Baze University                                      | 2011 |
| 12 | Bells University of Technology, Otta                 | 2005 |
| 13 | Benson Idahosa University, Benin City                | 2002 |
| 14 | Bingham University, New Karu                         | 2005 |
| 15 | Bowen University, Iwo                                | 2001 |
| 16 | Caleb University, Lagos                              | 2007 |
| 17 | Caritas University, Enugu                            | 2005 |
| 19 | Chrisland University                                 | 2015 |
| 20 | Covenant University Ota                              | 2002 |
| 21 | Crawford University Igbesa                           | 2005 |
| 22 | Crescent University                                  | 2005 |
| 23 | Edwin Clark University, Kaigbodo                     | 2015 |
| 24 | Elizade University, Ilara-Mokin                      | 2012 |
| 25 | Evangel University, Akaeze                           | 2012 |
| 26 | Fountain Unveristy, Oshogbo                          | 2007 |
| 27 | Godfrey Okoye University, Ugwuomu-Nike – Enugu State | 2009 |
| 28 | Gregory University, Uturu                            | 2012 |
| 29 | Hallmark University                                  | 2015 |
| 30 | Hezekiah University, Umudi                           | 2015 |
| 31 | Igbinedion University Okada                          | 1999 |
| 32 | Joseph Ayo Babalola University, Ikeji-Arakeji        | 2006 |
| 33 | Kings University                                     | 2015 |
| 34 | Kwararafa University, Wukari                         | 2005 |
| 35 | Landmark University, Omu-Aran.                       | 2011 |
| 36 | Lead City University, Ibadan                         | 2005 |
| 37 | Madonna University, Okija                            | 1999 |
| 38 | Mcpherson University, Seriki Sotayo, Ajebo           | 2012 |
| 39 | Micheal & Cecilia University                         | 2015 |
| 40 | Mountain Top University                              | 2015 |
| 41 | Nile University of Nigeria, Abuja                    | 2009 |
| 42 | Novena University, Ogume                             | 2005 |
| 43 | Obong University, Obong Ntak                         | 2007 |
| 44 | Oduduwa University, Ipetumodu – Osun State           | 2009 |
| 45 | Pan-Atlantic University, Lagos                       | 2002 |
| 46 | Paul University, Awka – Anambra State                | 2009 |
| 47 | Redeemer's University, Mowe                          | 2005 |
| 48 | Renaissance University, Enugu                        | 2005 |
| 49 | Rhema University, Obeama-Asa – Rivers State          | 2009 |
| 50 | Ritman University                                    | 2015 |
| 51 | Salem University, Lokoja                             | 2007 |
| 52 | Samuel Adegboyega University, Ogwa.                  | 2011 |
| 53 | Southwestern University, Oku Owa                     | 2012 |
| 54 | Summit University                                    | 2015 |
| 55 | Tansian University, Umunya                           | 2007 |

|    |                                                               |      |
|----|---------------------------------------------------------------|------|
| 56 | University of Mkar, Mkar                                      | 2005 |
| 57 | Veritas University                                            | 2007 |
| 58 | Wellspring University, Evbuobanosa – Edo State                | 2009 |
| 59 | Wesley University. of Science & Technology, Ondo              | 2007 |
| 60 | Western Delta University, Oghara Delta State                  | 2007 |
| 61 | Christopher University Mowe                                   | 2015 |
| 62 | Kola Daisi University Ibadan, Oyo State                       | 2016 |
| 63 | Anchor University Ayobo Lagos State                           | 2016 |
| 64 | Dominican University Ibadan Oyo State                         | 2016 |
| 65 | Legacy University, Okija Anambra State                        | 2016 |
| 66 | Arthur Jarvis University Akpoyubo Cross river State           | 2016 |
| 67 | Cn Hill University Eiyenkorin, Kwara State                    | 2016 |
| 68 | Coal City University Enugu State                              | 2016 |
| 68 | Clifford University Owerinta Abia State                       | 2016 |
| 69 | Admiralty University, Ibusa Delta State                       | 2017 |
| 70 | Spiritan University, Nneochi Abia State                       | 2017 |
| 71 | Precious Cornerstone University, Oyo                          | 2017 |
| 72 | PAMO University of Medical Sciences, Portharcourt             | 2017 |
| 73 | Atiba University Oyo                                          | 2017 |
| 74 | Eko University of Medical and Health Sciences Ijanikin, Lagos | 2017 |
| 75 | Skyline University, Kano                                      | 2018 |
| 76 | Greenfield University, Kaduna                                 | 2019 |
| 77 | Dominion University Ibadan, Oyo State                         | 2019 |
| 78 | Trinity University Ogun State                                 | 2019 |
| 79 | Westland University Iwo, Osun State                           | 2019 |
| 80 | Topfaith University, Mkpatak, Akwa Ibom State                 | 2021 |
| 81 | Thomas Adewumi University, Oko-Irese, Kwara State             | 2021 |
| 82 | Maranatha University, Mgbidi, Imo State                       | 2021 |
| 83 | Ave Maria University, Piyanko, Nasarawa State                 | 2021 |
| 84 | Al-Istiqama University, Sumaila, Kano State                   | 2021 |
| 85 | Mudiame University, Irrua, Edo State                          | 2021 |
| 86 | Havilla University, Nde-Ikom, Cross River State               | 2021 |
| 87 | Claretian University of Nigeria, Nekede, Imo State            | 2021 |
| 88 | NOK University, Kachia, Kaduna State                          | 2021 |
| 89 | Karl-Kumm University, Vom, Plateau State                      | 2021 |
| 90 | James Hope University, Lagos, Lagos State                     | 2021 |
| 91 | Maryam Abacha American University of Nigeria, Kano State      | 2021 |
| 92 | Capital City University, Kano State                           | 2021 |
| 93 | Ahman Pategi University, Kwara State                          | 2021 |
| 94 | University of Offa, Kwara State                               | 2021 |
| 95 | Mewar University, Masaka, Nasarawa State                      | 2021 |
| 96 | Edusoko University, Bida, Niger State                         | 2021 |
| 97 | Philomath University, Kuje, Abuja                             | 2021 |
| 98 | Khadija University, Majia, Jigawa State                       | 2021 |
| 99 | Anan University, Kwall, Plateau State                         | 2021 |



**Table S6** | List of Federal Polytechnics in Nigeria (NBTE, 2021a)

| S/N | Names of Federal Polytechnics in Nigeria                                         | Year Established |
|-----|----------------------------------------------------------------------------------|------------------|
| 1   | Akanu Ibiam Federal Polytechnic Unwana, Afikpo, Ebonyi State.                    | 1981             |
| 2   | Auchi Polytechnic, Auchi, Edo State.                                             | 1973             |
| 3   | Federal Polytechnic Ado Ekiti, Ekiti State.                                      | 1977             |
| 4   | Federal Polytechnic Bali, Taraba State.                                          | 2007             |
| 5   | Federal Polytechnic Bauchi, Bauchi State.                                        | 1979             |
| 6   | Federal Polytechnic Bida, Niger State.                                           | 1977             |
| 7   | Federal Polytechnic Damaturu, Yobe State.                                        | 1993             |
| 8   | Federal Polytechnic, Daura, Katsina State                                        | 2019             |
| 9   | Federal Polytechnic Ede, Osun State.                                             | 1992             |
| 10  | Federal Polytechnic Ekowe, Bayelsa State                                         | 2007             |
| 11  | Federal Polytechnic Idah, Kogi State.                                            | 1977             |
| 12  | Federal Polytechnic Ilaro, Ogun State.                                           | 1979             |
| 13  | Federal Polytechnic Ile-Oluji, Ondo State                                        | 2016             |
| 14  | Federal Polytechnic Kaura Namoda, Zamfara State.                                 | 1983             |
| 15  | Federal Polytechnic Kaltungo, Gombe State                                        | 2019             |
| 16  | Federal Polytechnic Mubi, Adamawa State.                                         | 1979             |
| 17  | Federal Polytechnic Nasarawa, Nasarawa State.                                    | 1983             |
| 18  | Federal Polytechnic Nekede, Owerri, Imo State.                                   | 1977             |
| 19  | Federal Polytechnic Offa, Kwara State.                                           | 1992             |
| 20  | Federal Polytechnic Oko, Anambra State.                                          | 1982             |
| 21  | Federal Polytechnic of Oil and Gas Bonny, Rivers State                           | 2014             |
| 22  | Federal Polytechnic Ukana, Akwa Ibom State                                       | 2014             |
| 23  | Hussaini Adamu Federal Polytechnic, Kazaure Jigawa State.                        | 1991             |
| 24  | Kaduna Polytechnic, Kaduna.                                                      | 1956             |
| 25  | National Institute of Construction Technology Uromi                              | 2014             |
| 26  | Waziri Umaru Federal Polytechnic, Birnin Kebbi.                                  | 1976             |
| 27  | Yaba College of Technology, Yaba, Lagos State.                                   | 1947             |
| 28  | Airforce Institute of Technology (AFIT), NAF Base Kaduna                         | 1977             |
| 29  | Petroleum Training Institute Effurun, Effurun. Delta State                       | 1972             |
| 30  | Nigerian Army Institute of Technology and Environmental Science (NAITES) Makurdi | 1960             |
| 31  | Nigerian College of Aviation Technology (NCAT), Sokoto Road, Zaria,              |                  |

**Table S7** | List of State Polytechnics in Nigeria (NBTE, 2021c)

| S/N | Names of State Polytechnics in Nigeria                                                      | Year Established |
|-----|---------------------------------------------------------------------------------------------|------------------|
| 1   | Abdu Gusau Polytechnic, Talata Mafara, Talata Mafara, Zamfara State.                        | 1992             |
| 2   | Abia State Polytechnic, Aba, Abia State.                                                    | 1992             |
| 3   | Abraham Adesanya Polytechnic, Dogbolu/Akanran Ibadan Road, Atikori, Ijebu-Igbo, Ogun State. | 2004             |

|    |                                                                                                     |           |
|----|-----------------------------------------------------------------------------------------------------|-----------|
| 4  | Abubakar Tatari Ali Polytechnic, Bauchi, Jos Rd, Bauchi, Bauchi State.                              | 1988      |
| 5  | Adamawa State Polytechnic, Yola, Adamawa State.                                                     | 1991      |
| 6  | Akwa Ibom State College of Art & Science, Nung Ukim, Akwa Ibom State.                               | 1997      |
| 7  | Akwa Ibom State Polytechnic, Ikot Osurua, Ikot -Ekpene, Akwa Ibom State.                            | 1991      |
| 8  | Bayelsa State College of Arts and Science, Elebele, Yenogoa                                         | 2002      |
| 9  | Benue State Polytechnic, Ugbokolo, Ugbokolo, Benue State.                                           | 1976      |
| 10 | Binyaminu Usman Polytechnic, Hadejia, Jigawa State                                                  | 2016      |
| 11 | D.S. Adegbenro ICT Polytechnic, Itori-Ewekoro, Ifo, Ogun State.                                     | 2004      |
| 12 | Delta State Polytechnic, Ogwashi-Uku, Ogwashi-Uku, Delta State                                      | 2002      |
| 13 | Delta State Polytechnic, Otefe-Oghara, Otefe-Oghara, Delta State                                    | 2002      |
| 14 | Delta State Polytechnic, Ozoro, Ozoro, Delta State.                                                 | 2003      |
| 15 | Delta State School of Marine Technology, Burutu, Warri, Delta State.                                | 2017      |
| 16 | Edo State Institute of Technology and Management, Usen, Benin City, Edo State.                      | 2002      |
| 17 | Enugu State Polytechnic, Iwollo                                                                     | 2017      |
| 18 | Gateway Polytechnic, Isara Ode-Remo, Ogun State.                                                    | 2004      |
| 19 | Hassan Usman Katsina Polytechnic (HUK), Katsina                                                     | 1983      |
| 20 | Ibarapa Polytechnic, Eruwa, Oyo State                                                               | 2013      |
| 21 | Imo State Polytechnic, Umuagwo, Ohaji, , Umuagwo, Ohaji Owerri, Imo State                           | 1978      |
| 22 | Institute of Management and Technology, Enugu, Enugu State.                                         | 1965      |
| 23 | Institute of Technology and Management (ITM), Ugep, Cross River State.                              | 2012      |
| 24 | Jigawa State Polytechnic, Dutse, Jigawa State.                                                      | 1991/2008 |
| 25 | Kano State Polytechnic, Kano, Kano State.                                                           | 1976      |
| 26 | Ken Sarowiwa Polytechnic, Bori, Rivers State.                                                       | 1988      |
| 27 | Kogi State Polytechnic, Lokoja, Kogi State.                                                         | 1993      |
| 28 | Kwara State Polytechnic, Ilorin, Kwara State.                                                       | 1973      |
| 29 | Lagos State Polytechnic, Ikorodu, Ikeja, Lagos, Lagos State.                                        | 1977      |
| 30 | Mai-Idris Aloomaa Polytechnic, Geidam, Yobe State.                                                  | 2002      |
| 31 | Moshood Abiola Polytechnic, Abeokuta (Converted to State University in 2017), Abeokuta, Ogun State. | 1979      |
| 32 | Nasarawa State Polytechnic, Lafia, Nasarawa State.                                                  | 2001      |
| 33 | Niger State Polytechnic, Zungeru, Niger State.                                                      | 1991      |
| 34 | Nuhu Bamalli Polytechnic, Zaria, Kaduna State.                                                      | 1989      |
| 35 | Ogun State Institute of Technology, Igbesa, Ogun State.                                             | 2004      |
| 36 | Ogun State Polytechnic, Ipokia                                                                      | 2017      |
| 37 | Oke-Ogun Polytechnic, Shaki, Oyo State                                                              | 2013      |
| 38 | Osun State College of Technology, Esa – Oke, Osun State.                                            | 1991      |
| 39 | Osun State Polytechnic, Iree, Osun State.                                                           | 1992      |
| 40 | Oyo State College of Agriculture and Technology, Igbo Ora                                           | 2018      |
| 41 | Plateau State Polytechnic, Barkin-Ladi, Jos, Plateau State.                                         | 1978      |

|    |                                                        |      |
|----|--------------------------------------------------------|------|
| 42 | Port-Harcourt Polytechnic, Port-Harcourt,Rivers State. | 1991 |
| 43 | Ramat Polytechnic, Maiduguri, Borno State.             | 1976 |
| 44 | Rufus Giwa Polytechnic, Owo, Ondo State.               | 1979 |
| 45 | Taraba State Polytechnic, Suntai                       | 2017 |
| 46 | The Polytechnic Ibadan, Ibadan, Oyo State.             | 1970 |
| 47 | Umaru Ali Shinkafi Polytechnic, Sokoto, Sokoto State.  | 2000 |
| 48 | Zamfara State College of Arts and Science, Gusau       | 2000 |

**Table S8** | List of Private Polytechnics in Nigeria (NBTE, 2021b)

| S/N | Names of Private Polytechnics in Nigeria                      | Year Established |
|-----|---------------------------------------------------------------|------------------|
| 1   | Al-Hikma Polytechnic Karu, Mararaba Gurku, Karu,Nasarawa      | 2016             |
| 2   | Allover Central Polytechnic, Sango Ota Ogun State             | 1998/2003        |
| 3   | Ajayi Polytechnic Ikere Ekiti, Ekiti State                    | 2017             |
| 4   | Ashi PolytechnicAnyiin, Benue State                           | 2018             |
| 5   | Best Solution Polytechnic, Akure Akure – Ondo State           | 2016             |
| 6   | Bolmor Polytechnic, Dugbe, Ibadan, Oyo State                  | 2015             |
| 7   | Calvary Polytechnic, Owa-OyibuDelta State                     | 2016             |
| 8   | Citi Polytechnic Dutse-Dawaki Road Dutse Alhaji FCT           | 2018             |
| 9   | Coastal Polytechnic,Apapa Lagos                               | 2020             |
| 10  | Covenant Polytechnic Abayi, AbaAbia State.                    | 2010             |
| 11  | Crown Polytechnic, Odo, Ekiti State                           | 2008             |
| 12  | Dorben Polytechnic, Abuja                                     | 1995/2008        |
| 13  | Eastern Polytechnic Rivers State                              | 2015             |
| 14  | Enville Institute of Management and Technology, Itokin, Lagos | 2019             |
| 15  | Fidei Polytechnic, Gboko-Aliade Road, Benue State.            | 2007             |
| 16  | Gboko Polytechnic, Gboko, Benue State                         | 2016             |
| 17  | Global Polytechnic, Akure, Ondo State                         | 2016             |
| 18  | Grace Polytechnic, Surulere, Lagos                            | 1962/1999        |
| 19  | Graceland Polytechnic, Offa, Kwara State                      | 2018             |
| 20  | Grundtvig Polytechnic Oba Anambra State                       | 2019             |
| 21  | Harry Pass Polytechnic Tse Usen Mkar Gboko Benue State        | 2020             |
| 22  | Heritage Polytechnic, Ikot Udota, Eket,Akwa Ibom State        | 2010             |
| 23  | Ibadan City Polytechnic, Ibadan Oyo                           | 2015             |
| 24  | Igbajo Polytechnic, Igbajo, Osun State.                       | 2009             |
| 25  | Interlink Polytechnic, Ijebu-Jesa, Osun State                 | 2008             |
| 26  | Kalac Christal Polytechnic, Lekki, Lagos State                | 2014             |
| 27  | Kings Polytechnic, Ubiaja, Edo State                          | 2010             |
| 28  | Landmark Polytechnic, Ayetoro/Itele Ogun State                | 2018             |
| 29  | Lagos City Polytechnic, Ikeja,                                | 1990/1995        |
| 30  | Lens Polytechnic, Offa, Kwara State                           | 2016             |
| 31  | Lighthouse Polytechnic, Benin City, Edo State                 | 2008             |
| 32  | Marist Polytechnic, Umuchigbo, Iji-Nike, Emene Enugu State    | 2016             |
| 33  | Mater Dei PolytechnicUgwuoba TownOji River LGAEnugu State     | 2018             |
| 34  | Nacabs Polytechnic, AkwangaP.M.B. 001 Akwanga, Nasarawa State | 2013             |
| 35  | Nogak Polytechnic, Ikom,Cross Rivers State                    | 2012             |

|    |                                                                                    |           |
|----|------------------------------------------------------------------------------------|-----------|
| 36 | Novelty Polytechnic, Kishi Kishi Oyo                                               | 2019      |
| 37 | Our Saviour Institute of Science, Agriculture & Technology, Enugu State.           | 1989/1991 |
| 38 | Prime Polytechnic, Jida Bassa, Ajaokuta, Kogi                                      | 2015      |
| 39 | Redeemers College of Technology & Management, Mowe, Ogun State                     | 2018      |
| 40 | Ronik Polytechnic, Ejigbo, Ikeja, Lagos, Lagos                                     | 2001/2003 |
| 41 | Saf Polytechnic, Iseyin Oyo State.                                                 | 2018      |
| 42 | Savanah Institute of Technology, Abakaliki, Ebonyi                                 | 2017      |
| 43 | Shaka Polytechnic, Benin City, Edo State.                                          | 2013      |
| 44 | Speedway Polytechnic, Osoba Ojodu, Ogun State                                      | 2019      |
| 45 | St. Mary Polytechnic, Kwamba-Suleja, Niger State                                   | 2015      |
| 46 | Stars Polytechnic Ota Ogun                                                         | 2020      |
| 47 | Southern Atlantic Polytechnic, Uyo – Akwa Ibom State                               | 2020      |
| 48 | Sure Foundation Polytechnic, Ikot Akai, Ibom State                                 | 2016      |
| 49 | Temple Gate Polytechnic, Abayi, Osioma, Abia State.                                | 2009      |
| 50 | The Polytechnic, Igbo-Owu, Kwara State                                             | 2015      |
| 51 | The Polytechnic, Ile-Ife, Osun State.                                              | 1994/1999 |
| 52 | The Polytechnic Iresi (Formerly College of Technology, Iresi) Osun State           | 2014      |
| 53 | The Polytechnic Otada Adoka, Otukpo, Benue State                                   | 2016      |
| 54 | Timeon Kairos Polytechnic Lagos                                                    | 2019      |
| 55 | Tower Polytechnic, Ibadan                                                          | 2010      |
| 56 | Trinity Polytechnic Uyo, Akwa Ibom State                                           | 2016      |
| 57 | Uma Ukpai Polytechnic, Asaga Ohafia, Abia State                                    | 2017      |
| 58 | Uyo City Polytechnic, Akwa Ibom State                                              | 2014      |
| 59 | Valley View Polytechnic, Ohafia Abia State                                         | 2016      |
| 60 | Villanova Polytechnic, Imesi-Ile (Formerly The Polytechnic, Imesi-Ile) Osun State. | 2013      |
| 61 | Wolex Polytechnic, Osun State                                                      | 1996/1    |

**Table S9** | List of Federal Colleges of Education in Nigeria (NBTE, 2021a; NCCE, 2021)

| S/N | Names of Federal Colleges of Education in Nigeria | Location                |
|-----|---------------------------------------------------|-------------------------|
| 1   | Federal College of Education (Technical), Asaba   | Asaba, Delta State.     |
| 2   | Federal College of Education, Kano                | Kano City, Kano State.  |
| 3   | Federal College of Education (Special), Oyo       | Oyo, Oyo State.         |
| 4   | Federal College of Education, Abeokuta            | Abeokuta, Ogun State    |
| 5   | Federal College of Education, Eha-Amufu           | Eha Amufu, Enugu State. |
| 6   | Federal College of Education (Technical), Gombe   | Gombe, Gombe State.     |
| 7   | Federal College of Education, Kontagora           | Kontagora, Niger State. |
| 8   | Federal College of Education, Okene               | Okene, Kogi State.      |
| 9   | Federal College of Education (Technical), Omoku   | OMoku, Rivers State.    |
| 10  | Federal College of Education (Tech), Potiskum     | Potiskum, Yobe State    |
| 11  | Alvan Ikoku College of Education, Owerri          | Owerri, Imo State.      |
| 12  | Federal College of Education (Technical), Akoka   | Akoka, Lagos State.     |
| 13  | Federal College of Education (Technical), Bichi   | Bichi, Kano State       |
| 14  | Federal College of Education (Technical), Gusau   | Gusau, Zamfara State.   |

|    |                                                  |                           |
|----|--------------------------------------------------|---------------------------|
| 15 | Federal College of Education, Katsina            | Katsina, Katsina State.   |
| 16 | Federal College of Education, Obudu              | Obudu, Cross River State. |
| 17 | Adeyemi College of Education, Ondo               | Ondo, Ondo State.         |
| 18 | Federal College of Education, Pankshin           | Pankshin, Plateau State.  |
| 19 | Federal College of Education, Yola               | Yola, Adamawa State.      |
| 20 | Federal College of Education, Zaria10.           | Zaria, Kaduna State.      |
| 21 | Nigerian Army School of Education (NASE), Ilorin | Ilorin, Kwara State.      |
| 22 | Federal College of Education (T), Umunze         | Umunze                    |

**Table S10** | List of State Colleges of Education in Nigeria (NBTE, 2021b; NCCE, 2021)

| S/N | Names of State Colleges of Education in Nigeria          | Location                        |
|-----|----------------------------------------------------------|---------------------------------|
| 1   | College of Education, Gindiri                            | Gindiri, Plateau State.         |
| 2   | Adamawa State College of Education, Hong                 | Yola, Adamawa State.            |
| 3   | Tai Solarin College of Education, Ijebu-Ode              | Ijebu-Ode, Ogun State.          |
| 4   | College of Education, Ikere-Ekiti                        | Ikere-Ekiti, Ekiti State.       |
| 5   | Ebonyi State College of Education, Ikwo                  | Ikwo, Ebonyi State.             |
| 6   | College of Education, Warri                              | Edjeba Road, Warri, Delta State |
| 7   | FCT College of Education, Zuba                           | Zuba, Garki, FCT Abuja.         |
| 8   | Osisatech College of Education, Enugu                    | Enugu, Enugu State.             |
| 9   | Nasarawa State College of Education, Akwanga             | Akwanga, Nassarawa State.       |
| 10  | Isa Kaita College of Education, Dutsin-Ma                | Dutsin-Ma, Katsina State.       |
| 11  | College of Education, Ekiadolor-Benin                    | Ekiadolor-Benin, Edo State      |
| 12  | College of Education, Gashua, Damaturu                   | Gashua, Yobe state.             |
| 13  | Kaduna State College of Education, Gidan-Waya, Kafanchan | Kafanchan, Kaduna State.        |
| 14  | Osun State College of Education, Ilesa                   | Ilesa, Osun State.              |
| 15  | Kwara State College of Education, Ilorin                 | Ilorin, Kwara State.            |
| 16  | Kwara State College of Education                         | Oro, Kwara State.               |
| 17  | College of Education, katsina-Ala                        | Katsina-Ala, Benue State.       |
| 18  | Sa'adatu Rimi College of Education, Kumbotso, Kano       | Kumbotso, Kano State.           |
| 19  | College of Education (Technical), Lafiagi                | Lafiagi, Kwara State.           |
| 20  | Nwafor Orizu College of Education, Nsugbe                | Nsugbe, Anambra State.          |
| 21  | Adeniran Ogunsanya College of Education, Otto/Ijanikin   | Otto/Ijanikin, Lagos State.     |
| 22  | Emmanuel Alayande College of Education (EACOED), Oyo     | Oyo, Oyo State.                 |
| 23  | College of Education, Waka BIU                           | Waka BIU, Borno State.          |
| 24  | St. Augustine College of Education (Project Time), Lagos | Yaba, Lagos State.              |
| 25  | Delta State College of Education, Agbor                  | Agbor, Delta State              |
| 26  | Akwa Ibom State College of Education, Afahansit          | Afahansit, Akwa Ibom State.     |
| 27  | Kogi State College of Education, Ankpa                   | Ankpa, Kogi state.              |
| 28  | Adamu Augie College of Education, Argungu                | Argungu, Kebbi State.           |
| 29  | College of Education, Azare                              | Azare, Bauchi State             |

|    |                                                                               |                                    |
|----|-------------------------------------------------------------------------------|------------------------------------|
| 30 | Umar Ibn Ibrahim El-Kanemi College of Education, Science and Technology, Bama | Bama, Borno State.                 |
| 31 | College of Education, Jalingo                                                 | Jalingo, Taraba State.             |
| 32 | Zamfara State College of Education, Maru                                      | Maru, Zamfara State.               |
| 33 | Jigawa State College of Education, Gumel                                      | Gumel, Jigawa State.               |
| 34 | Niger State College of Education, Minna                                       | Minna, Niger State.                |
| 35 | Rivers College of Education, Rumuolumeni                                      | Port-harcourt, Rivers State.       |
| 36 | Shehu shagari College of Education, Sokoto                                    | Sokoto, Sokoto State.              |
| 37 | Jama'Atu College of Education (JACE), Kaduna                                  | Kaduna, Kaduna State.              |
| 38 | College of Education, Arochukwu, Abia                                         | Arochukwu Abia State               |
| 39 | College of Education, Ila-Orangun, Osun State                                 | Ila-Orangun, Osun State            |
| 40 | Michael Otedola Coll. of Prim. Education, Lagos                               | Noforija-Epe Lagos                 |
| 41 | Kashim Ibrahim College of Educ., Maiduguri                                    | Borno State                        |
| 42 | Delta State Coll. of Physical Education, Mosogar                              | Mosogar, Sapele, Delta State       |
| 43 | Enugu State Coll. of Education (T), Enugu                                     | Abakaliki Road, Enugu State        |
| 44 | Cross River State Coll. of Education, Akampa                                  | Akampa, Calabar, Cross River State |
| 45 | Edo State College of Education, Igueben                                       | Igueben, Edo State                 |
| 46 | Isaac Jasper Boro COE, Sagbama                                                | Sagbama, Yenogoa, Bayelsa State    |
| 47 | Kogi State College of Education, Kabba                                        | Kabba, Kogi State                  |

**Table S11** | List of Private Colleges of Education in Nigeria (NBTE, 2021b; NCCE, 2021)

| S/N | Names of Private Colleges of Education in Nigeria           | Location                        |
|-----|-------------------------------------------------------------|---------------------------------|
| 1   | Institute of Ecumenical Education, (Thinkers Corner), Enugu | Enugu, Enugu State.             |
| 2   | Delar College of Education                                  | Agodi Gate, Ibadan, Oyo State   |
| 3   | City College of Education, Mararaba, Gurku                  | Mararaba, Gurku, Nasarawa State |
| 4   | Ansar-Ud-Deen College of Education, Isolo                   | Oshodi, Isolo, Lagos State.     |
| 5   | Yewa Central College of Education, Ayetoro                  | Ayetoro, Ogun State.            |
| 6   | OSISA Tech. Coll. of Education, Enugu                       | Enugu, Enugu State              |
| 7   | St. Augustine Coll. of Education, Lagos                     | Akoka, Lagos                    |
| 8   | African Thinkers Community of Inquiry, Enugu                | Enugu, Enugu State              |
| 9   | Muftau Olanihun College of Education, Ibadan                | Ibadan                          |
| 10  | Havard Wilson College of Education, Aba                     | Aba, Abia State State           |
| 11  | Muhyideen College of Education, Ilorin                      | Ilorin                          |
| 12  | College of Education, Offa                                  | Offa, Kwara State               |
| 13  | Bauchi Institute of Arabic & Islamic Studies, Bauchi        | Bauchi                          |
| 14  | Corner Stone College of Education, lagos                    | Unilag, Lagos                   |
| 15  | Peaceland College of Education, Enugu                       | Enugu                           |
| 16  | The College of Education, Nsukka                            | Enugu                           |
| 17  | Unity College of Education, Auka Adoka, Benue               | Otikpo                          |
| 18  | Diamond College of Education, Aba                           | Aba                             |
| 19  | Kinsey College of Education, Ilorin, Kwara State            | Ilorin                          |
| 20  | ECWA College of Education, Jos (ECOEJ)                      | Jos                             |

**Table S12** | List of Federal Monotechnics in Nigeria (NBTE, 2021a)

| S/N | Names of Federal Monotechnics in Nigeria               | Location         |
|-----|--------------------------------------------------------|------------------|
| 1   | Federal Cooperative College Ibadan                     | Oyo State.       |
| 2   | Federal Cooperative College Kaduna                     | Kaduna State     |
| 3   | Federal Cooperative College, Oji River                 | Enugu State.     |
| 4   | Federal College of Statistics, Enugu                   | Enugu State      |
| 5   | Federal College of Statistics, Ibadan                  | Oyo State        |
| 6   | Federal College of Statistics, Kaduna                  | Kaduna State     |
| 7   | Federal School of Mines, Jos                           | Plateau State    |
| 8   | Federal School of Survey, Oyo                          | Oyo State        |
| 9   | Federal Training Centre, Calabar                       | Cross River      |
| 10  | Federal Training Centre, Enugu                         | Enugu State      |
| 11  | Federal Training Centre, Kaduna                        | Kaduna State     |
| 12  | Federal Training Centre, Maiduguri                     | Borno            |
| 13  | Maritime Academy of Nigeria, Oron                      | Akwa Ibom State. |
| 14  | Metallurgical Training Institute, Onitsha              | Anambra State.   |
| 15  | National Water Resources Institute, Mando, Kaduna.     | Kaduna State     |
| 16  | Nigerian Army School of Engineering, Makurdi           | Benue State.     |
| 17  | Nigerian Army School of Finance, Administration, Apapa | Lagos State      |
| 18  | Nigerian Army School of Signals Apapa, Lagos           | Lagos State      |
| 19  | Nigerian College of Aviation Technology (NCAT) Zaria   | Kaduna State     |
| 20  | Nigerian Naval Engineering College, Sapele,            | Delta State      |
| 21  | NITEL Training School, Oshodi,                         | Lagos State      |

**Table S13** | List of State Monotechnics in Nigeria (NBTE, 2021c)

| S/N | Names of State Monotechnics in Nigeria                   | Location     |
|-----|----------------------------------------------------------|--------------|
| 1   | College of Administration and Business Studies, Konduga  | Borno State. |
| 2   | College of Administration and Business Studies, Potiskum | Yobe State   |

**Table S14** | List of Private Monotechnics in Nigeria (NBTE, 2021b)

| S/N | List of Private Monotechnics in Nigeria | Location    |
|-----|-----------------------------------------|-------------|
| 1   | Nigerian Institute of Journalism (NIJ)  | Lagos State |
| 2   | Wavecrest College of Catering, Surulere | Lagos State |

## CONFLICT OF INTEREST

The authors declare that the research was conducted in the absence of any commercial or financial relationships that could be construed as a potential conflict of interest.

## FUNDING

This research did not receive any specific grant from funding agencies in the public, commercial, or not-for-profit sectors.

## REFERENCES

- Commonwealth Network, CWN, (2021). Research Institutes in Nigeria. Retrieved January 27, 2021, from [https://www.commonwealthofnations.org/sectors-nigeria/education/research\\_institutes/](https://www.commonwealthofnations.org/sectors-nigeria/education/research_institutes/)
- Federal Ministry of Agricultural and Rural Development (FMARD), (2021). List of Research Institutes. Retrieved May 25, 2021 from <https://fmard.gov.ng/research-institutes/>
- National Board for Technical Education, NBTE, (2021). Approved federal polytechnics. Retrieved January 11, 2021, from <https://net.nbte.gov.ng/Federal%20Polytechnics>
- National Board for Technical Education, NBTE, (2021). Approved and accredited private polytechnics. Retrieved February 18, 2021, from <https://net.nbte.gov.ng/Private%20Polytechnics>
- National Board for Technical Education, NBTE, (2021). Accredited state polytechnics. Retrieved February 23, 2021, from <https://net.nbte.gov.ng/State%20Polytechnics>
- National Commission for Colleges of Education, NCCE, (2021). List of accredited colleges of education. Retrieved December 20, 2020 from <https://www.ncceonline.edu.ng/colleges.php>
- National University Commission, NUC, (2021). Federal universities in nigeria. Retrieved April 14, 2021, from <https://www.nuc.edu.ng/nigerian-universities/federal-universities/>
- National University Commission, NUC, (2021). Private universities in nigeria. Retrieved May 5, 2021, from <https://www.nuc.edu.ng/nigerian-universities/private-universities/>
- National University Commission, NUC, (2021). State universities in nigeria. Retrieved May 10, 2021, from <https://www.nuc.edu.ng/nigerian-universities/state-university/>
- Nigerian Guide (2021). Full list of research institutes in nigeria. Retrieved May 22, 2021, from <https://nigerianguide.com.ng/full-list-of-research-institutes-in-nigeria/>

*Copyright © 2021 Igiri, Okoduwa, Akabuogu, Okoduwa, Enang, Idowu, Abdullahi, Onukak, Onuruka, Christopher, Salawu, Chris and Onyemachi. This is an open-access article distributed under the terms of the Creative Commons Attribution License (CC BY). The use, distribution or reproduction in other forums is permitted, provided the original author(s) and the copyright owner(s) are credited and that the original publication in this journal is cited, in accordance with accepted academic practice. No use, distribution or reproduction is permitted which does not comply with these terms.*
